1 **Developing and validating a multivariable prediction model for**  
2 **predicting costs of colon surgery**

3 Anas Taha<sup>1,2,†</sup>, Stephanie Taha-Mehlitz<sup>3,†</sup>, Vincent Ochs<sup>1</sup>, Bassey Enodien<sup>2</sup>, Michael  
4 Drew Honaker<sup>4</sup>, Daniel M. Frey<sup>2,††</sup> and Philippe C. Cattin<sup>1,††</sup>

5

6 1. Department of Biomedical Engineering, Faculty of Medicine, University of Basel,  
7 Allschwill, Switzerland

8 2. Department of Surgery, GZO Hospital, Wetzikon, Switzerland

9 3. Clarunis, Department of visceral Surgery, University Center for Gastrotestinal and liver  
10 Diseases, St. Clara Hospital, Basel Switzerland

11 4. Department of Surgical Oncology and Colorectal Surgery, East Carolina University,  
12 Brody School of Medicine, Greenville, North Carolina, USA.

13 † These authors contributed equally to this work and share the first authorship.

14 †† These authors contributed equally to this work and share the last authorship.

15

16 Correspondence: [anas.taha@unibas.ch](mailto:anas.taha@unibas.ch)

17

18

19

## 20 **Abstract**

21 Hospitals are burdened with predicting, calculating and managing various cost-affecting  
22 parameters regarding patients and their treatments. Accuracy in cost prediction is further affected  
23 if a patient suffers from other health issues which hinder the traditional prognosis. This can lead  
24 to an unavoidable deficit in the final revenue of medical centers. This study aims to determine  
25 whether machine learning (ML) algorithms can predict cost factors based on patients undergoing  
26 colon surgery. For the forecasting, multiple predictors will be taken into the model to provide a  
27 tool that can be helpful for hospitals to manage their costs which ultimately will lead to operating  
28 more cost-efficiently. . This proof of principle will lay the groundwork for an efficient ML-based  
29 prediction tool based on multicenter data from a range of international centers in the subsequent  
30 phases of the study. With a % MAPE result of 18 – 25.6, our model's prediction showed decent  
31 results to forecast the costs regarding various diagnosed factors and surgical approaches. There  
32 is an urgent need for further studies on predicting cost factors, especially for cases with  
33 anastomotic leakage, to minimize unnecessary costs for hospitals.

34

## 35 **1. Introduction**

### 36 1.1 Background

37 Colorectal cancer (CRC) is one of the most prevalent cancers in the world today based on  
38 diagnoses, with about 1.8 million cases being diagnosed and about 0.7 million related deaths  
39 occurring annually. In addition, CRC accounts for 10% of all newly diagnosed cancers, a  
40 considerable social and economic burden for many nations worldwide (1). One of the treatment  
41 modalities for colorectal cancer is surgery. Surgery is aimed at obtaining an adequate oncologic  
42 resection while re-establishing intestinal continuity. Over time, there have been improvements in  
43 the way the disease is treated. But existing patient comorbidities can limit the surgical procedures.  
44 The time required to prepare patients for surgery and address their comorbidities contribute to  
45 increased surgical costs. However, despite many improvements, significant other complications  
46 still occur during, and especially after, a surgical procedure. To avoid this, the patient is placed  
47 in necessary post-operative care, generally for 5 and 7 days after a surgical operation. Other post-  
48 operative risk factors will further add to the surgical cost, but their prediction is very vague due  
49 to the absence of sufficient datasets. These involve performing a colorectal anastomosis,  
50 anastomotic leak, (2), delirium or prolonged ileus (3), other emergency surgeries, longer intra-  
51 operative time, and peritoneal contamination

52 The comorbidities and longer stays result in a cost burden for patients and hospitals. This  
53 is why prediction models are now being updated to determine the costs for anastomotic  
54 insufficiency. Prediction models are normally used to estimate the probability of achieving a  
55 particular outcome (4). A large number of prediction models have been developed, but only a  
56 small number are used because not all models accurately predict the desired outcome (5). This

57 study focuses on developing and validating a multivariable prediction model to predict costs for  
58 patients undergoing colon surgery while considering their stay in the hospital. This will help  
59 determine the cost burden due to variable hospital length of stay (LOS) as well as days spent in  
60 intensive care units (ICU). The medical context is prognostic in that it is focused on predicting  
61 the cost of overall expenditure involved in colon surgery for the clinical center and the patient.

## 62 1.2 Rationale

63 The rationale for developing and validating the multivariable model is that it will help  
64 accurately predict the costs associated with colon surgery. Accurate prediction will help patients  
65 and practices employed by the hospital make more informed decisions, as well as aid in policies  
66 enacted by the government. The results that come with the use of the model will also aid in  
67 surgical planning. In short, developing and validating the multivariable model will provide  
68 insight into costs involved in colon surgery. In turn, it will allow revisions in care and help  
69 develop strategies for improved management. Similar studies for prediction purposes have been  
70 conducted in the field of medicine. For example, Musunuri et al. have used machine learning in  
71 the form of artificial intelligence to predict 90-day liver disease mortality. Focused on acute-on-  
72 chronic liver failure, they achieved a model with an accuracy of 94.12% and an area under the  
73 curve of 0.915 (6). Hameed et al. wrote about the impact of artificial intelligence on urological  
74 diseases. In their literature review, they have pointed to multiple publications using various  
75 models like support vector machine, nearest neighbour, random forrest, convolutional neural  
76 network or artificial neural networks to predict and classify diseases like prostate cancer,  
77 urothelial cancer, renal cancer or urolithiasis. What differs from those publications and their work  
78 from ours is, that they use a classification model instead of a regression model. The most  
79 important benefit of using a regression model compared to a classification model is that it helps  
80 predict continuous values, whereas classification models try to predict discrete class labels. To  
81 predict the costs associated with colon surgery in an accurate way, a machine learning regression  
82 model is used. Using this approach. We aim to contribute to an existing gap in this field (7).

## 83 1.3 Objectives

- 84 • To develop prediction models for the final costs in patients based on multiple predictors.
- 85 • To test the models in terms of their ability to accurately predict the final costs associated  
86 with colon surgery in patients.

## 87 2. Methods

### 88 2.1 Overview and Data Collection

89 Data was extracted from a registry of patients who underwent colonic anastomosis for  
90 various reasons such as tumors, diverticulitis, mesenterial ischemia, iatrogenic or traumatic  
91 perforation, or inflammatory bowel disease (aggregated as “non-tumor”) at the Hospital of  
92 Wetzikon from 1<sup>st</sup> January 2013 to the 31<sup>st</sup> December of 2019. No patients were excluded from  
93 the initial data collection. Furthermore, this study was completed based on the transparent  
94 reporting of a multivariable prediction model for individual prognosis or diagnosis (TRIPOD)

95 statement checklist for prediction model development (8).

96 Utilizing this data, we developed a machine learning model to predict the costs of colon  
97 surgery.

## 98 2.2 Ethical Considerations

99 The registry data was approved by an institutional review board, where the patients'  
100 informed consent was waived. The study was registered at [Req 2021-01107].

## 101 2.3 Predictors and Outcome Measures

102 Recorded variables include Insurance (general/semi-private/private), age, surgical  
103 procedure (Hartmann/left sided hemicolectomy and extended left sided hemicolectomy/ right  
104 sided hemicolectomy and extended right sided hemicolectomy/sigmoid resection), surgical  
105 approach (open/laparoscopic), diagnosis (tumor/non-tumor), final costs (the sum of all cost  
106 factors), length of stay (in days), Intensive care stay (in days), operation time (in minutes),  
107 anaesthesia time (in minutes), ASA-Score (I,II,III,IV), gender (male/female), CCI (Charlson  
108 Comorbidity Index), anastomotic insufficiency and emergent/non-emergent. The data on the  
109 final cost, which is the sum of all the costs incurred during the stay in hospital for surgery, were  
110 collected in CHF (Swiss Francs). Other cost factors not incorporated since they add up to the final  
111 costs include administrative costs, costs of hospitality, nurse costs, costs of infrastructure, doctor  
112 costs, medical costs, operational costs, anesthesia costs and care costs.

## 113 2.4 Model Development

114 Data was randomly split into two sets, 80% of the data was put into a training set to build  
115 the models and 20% was utilized for a test set to validate the models and assess their performance  
116 internally. The two sets had approximately the same class distribution (Gaussian). The following  
117 14 predictors were chosen to predict the final costs based on regression and clinical insights: age,  
118 gender, insurance, diagnosis, operation, surgical approach, hospitalization, intensive care,  
119 surgical procedure and anaesthesia time, CCI, ASA-Score, anastomotic insufficiency and  
120 emergency surgery (9).

121 By having variables included, such as the CCI and the ASA-Score, we are able to cover a  
122 large number of diseases that are included in the comorbidity index.

123 A variety of machine learning models were developed, including generalized boosted  
124 regression, random forest, and decision trees. An interaction depth of 3 and a total number of 500  
125 trees were chosen, as was the type of the random forest and the regression model. The  
126 classification/predictive performance was measured using the mean absolute percentage error  
127 (MAPE), where a result of < 10% is classified as highly accurate, <20% denotes as a good forecast  
128 20%-50% as a reasonable forecast and everything >50% as an inaccurate forecast (10). The MAPE  
129 factor, also known as mean absolute percentage deviation (MAPD), is used for accuracy of a  
130 forecasting prediction. Continuous data are reported as mean  $\pm$  standard deviation (SD) or  
131 median (interquartile range (IQR)) and categorical data as numbers (percentages).  
132 Hyperparameters were tuned, and the final model was selected based on the MAPE. The final  
133 model chosen was the random forest model based on its superior performance.

134 The analysis was carried out using R version 4.0.4. The random forest library was used for  
135 the random forest models, the metrics library used for the calculation of the performance  
136 measurements, the gbm library for the generalized boosted regression models and the rpart  
137 library was used for the other models.

### 138 2.5 Deployment

139 The best performing model will be deployed as a web-based, user-friendly application using  
140 RShiny to predict the final costs, that considers the different cost factors.

141 (Accessible via : [https://colonsurgerycost.shinyapps.io/Final\\_Cost/](https://colonsurgerycost.shinyapps.io/Final_Cost/) ).

142

## 143 3. Results

### 144 3.1 Cohort

145 A total of 347 patients were included in our study. This number consists of all patients from  
146 the center who suffered from the diagnosed factors of section 3 and had to undergo the type of  
147 operations mentioned. The mean age was  $67 \pm 14$  years (range 28-94). 162 (47%) patients were  
148 male and 185 (53%) were female. Tables 1 and 2 provide all baseline variables and their  
149 descriptive statistics. Continuous variables were recorded as mean  $\pm$  SD (range) in Table 1.

150 Categorical variables were recorded as numbers (percentage) on Table 2. No missing  
151 values were detected. Table 3 provides the variables' characteristics and descriptive statistics that  
152 are not mentioned in Table 1 or Table 2 and are based on their impact on the final costs.

153

| Variable        | Overall (n) | Mean (SD)        | Min      | Max    | Range   | Median (IQR) |
|-----------------|-------------|------------------|----------|--------|---------|--------------|
| Age             | 347         | 67 (14)          | 28       | 94     | 66      | 68           |
| Hospital days   | 347         | 9 (10)           | 1        | 84     | 83      | 5            |
| ICU days        | 347         | 1 (5)            | 0        | 70     | 70      | 0            |
| Operation time  | 347         | 175 (102)        | 23       | 1.280  | 1.257   | 154          |
| Anesthesia time | 347         | 119 (90)         | 45       | 1.020  | 997     | 95           |
| Final Cost      | 347         | -32.502 (45.650) | -52.0591 | -7.485 | 52.8076 | -20.011      |
| CCI             | 347         | 4 (3)            | 0        | 16     | 16      | 3            |

154 Table 1. Variable characteristics for continuous values.

155

156

157

| Variable | n (%)     |
|----------|-----------|
| Gender   |           |
| Male     | 162 (47%) |
| Female   | 185 (53%) |

|                                  |           |
|----------------------------------|-----------|
| <b>Insurance</b>                 |           |
| General                          | 283 (82%) |
| Semi-Private                     | 49 (14%)  |
| Private                          | 15 (4%)   |
| <b>Diagnosis</b>                 |           |
| Tumor                            | 162 (47%) |
| Non-Tumor                        | 185 (53%) |
| <b>Emergency Surgery</b>         |           |
| No                               | 331 (95%) |
| Yes                              | 16 (5%)   |
| <b>Operation</b>                 |           |
| Hartmann`s procedure             | 19 (5%)   |
| Hemicolectomy left               | 16 (4%)   |
| Extended Hemicolectomy left      | 6 (2%)    |
| Hemicolectomy right              | 82 (24%)  |
| Extended Hemicolectomy right     | 6 (2%)    |
| Sigmoid resection                | 218 (63%) |
| <b>Surgery approach</b>          |           |
| Open                             | 153 (44%) |
| Laparoscopic                     | 194 (56%) |
| <b>Anastomotic insufficiency</b> |           |
| No                               | 331 (95%) |
| Yes                              | 16 (5%)   |
| <b>ASA Score</b>                 |           |
| I                                | 12 (4%)   |
| II                               | 184 (53%) |
| III                              | 137 (39%) |
| IV                               | 14 (4%)   |

158 Table 2. Variable characteristics for categorical values.

159

| Variable         | Overall (n) | Mean (SD)        | Min      | Max     | Median (Q1, Q3)            | P-Value |
|------------------|-------------|------------------|----------|---------|----------------------------|---------|
| <b>Insurance</b> | 347         | -32.502 (45.650) | -520.591 | -7.485  | -20.011 (-28.828, -15.332) | 0.643   |
| General          | 283         | -31.773 (47.490) | -520.591 | -7.485  | -18.433 (-27.464, -14.823) |         |
| Semi-Private     | 49          | -33.495 (27.892) | -192.811 | -10.919 | -22.645 (-40.043, -19.795) |         |
| Private          | 15          | -42.996 (57.232) | -241.331 | -13.915 | -23.979 (-39.017, -18.426) |         |
| <b>Diagnosis</b> | 347         | -32.502 (45.650) | -520.591 | -7.485  | -20.011 (-28.828, -15.332) | 0.842   |
| Tumor            | 162         | -33.025 (40.120) | -298.957 | -7.485  | -21.129 (-28.294, -15.790) |         |
| Non-Tumor        | 185         | -32.043 (50.098) | -52.059  | -9.929  | -19.155 (-29.688, -14.859) |         |
| <b>Operation</b> | 347         | -32.502 (45.650) | -52.0591 | -7.485  | -20.011 (-28.828, -15.332) | <0.001  |
| Hartmann         | 19          | -25.479 (20.230) | -75.676  | -7.485  | -18.433 (-24.551, -14.053) |         |

|                                  |     |                    |          |         |                            |        |
|----------------------------------|-----|--------------------|----------|---------|----------------------------|--------|
| Hemicolectomy left               | 16  | -65.777 (91.964)   | -38.419  | -15.045 | -32.297 (-70.713, -18.876) |        |
| Extended Hemicolectomy left      | 6   | -11.0698 (20122)   | -520.591 | -13.915 | -28.751 (-46.173, -22.338) |        |
| Hemicolectomy right              | 82  | -35135 (39.474)    | -241.331 | -10.665 | -22.469 (-35.663, -16.468) |        |
| Extended Hemicolectomy right     | 6   | -65.768 (114.464)  | -298.957 | -13.086 | -17.726 (-29.401, -14.799) |        |
| Sigmoid resection                | 218 | -26.613 (23.764)   | -192.811 | -9.379  | -18.684 (-25.538, -15.180) |        |
| <b>Surgery approach</b>          | 347 | -32.502 (45.650)   | -520.591 | -7.485  | -20.011 (-28.828, -15.332) | <0.001 |
| Open                             | 153 | -46.531 (64.486)   | -520.591 | -7.485  | -25.989 (-45.758, -18.708) |        |
| Laparoscopic                     | 194 | -21.437 (13.486)   | -91.098  | -9.379  | -17.275 (-21.765, -14.685) |        |
| <b>Anastomotic insufficiency</b> | 347 | -32.502 (45.650)   | -520.591 | -7.485  | -20.011 (-28.828, -15.332) | <0.001 |
| No                               | 331 | -26.051 (20.763)   | -192.811 | -7.485  | -19.472 (-27.204, -15.121) |        |
| Yes                              | 16  | -165.941 (136.653) | -520.591 | -27.444 | 114.158 (225.666, -78.015) |        |
| <b>ASA Score</b>                 | 347 | -32.502 (45.650)   | -520.591 | -7.485  | -20.011 (-28.828, -15.332) | <0.001 |
| I                                | 12  | -20.626 (5.177)    | -30.208  | -14.035 | -20.982 (-23.627, -16.212) |        |
| II                               | 184 | -23.129 (21.680)   | -241.331 | -7.485  | -17.938 (-22.591, -14.515) |        |
| III                              | 137 | -38.328 (44.857)   | -384.159 | -10.665 | -22.645 (-43.274, -16.997) |        |
| IV                               | 14  | -108.844 (140.598) | -520.591 | -20.280 | -53.515 (-79.035, -33.144) |        |

160 Table 3. Descriptive statistics based on final costs.

161

162

### 163 3.2 Model Performance

164 During internal validation, the performance of all three models was tested and stated with  
 165 their mean value and their 95% confidence intervals (Table 3). The random forest classifier  
 166 provided the highest MAPE for predicting the final costs (21.4). Thus, it was the model with the  
 167 best internal validation performance and was subsequently used for predicting costs (11). In  
 168 comparison, the decision tree and general boosted regression model displayed results for MAPE  
 169 of only 25.5 and 29.7, respectively. Therefore, the average of the MAPE for the final costs is around  
 170 21.4 which means that on average, the forecast of this prediction model regarding the final costs  
 171 are off by 21.4%. Since a MAPE value of <20% is considered as being “good”, our result is showing  
 172 decent results. The percentage of the random forest classifier's variance, which was explained in  
 173 the models, varied from 73.81% to 81.05%. Specific feature importance according to the random  
 174 forest classifier is displayed as Gini Index in Figure 1, while Figure 2 shows the prediction of the  
 175 Random Forest Classifier compared to the actual observed values from the test data set for the  
 176 final cost factor.

177

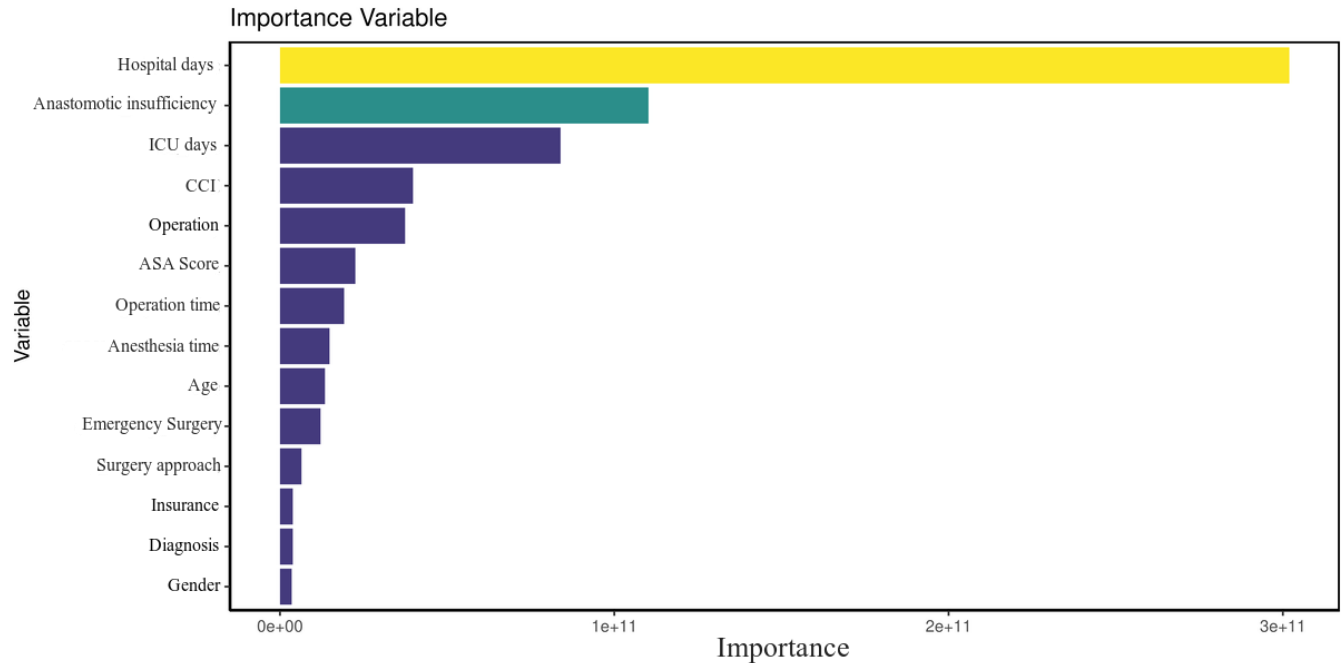

178

179

180 Figure 1. Total decrease in node impurities, measured by the Gini index from splitting on the  
181 variable, averaged over all trees.

182

183 In Figure 1, one can see those factors such as LOS and anastomotic insufficiency as well as  
184 intensive care unit stay are the best predictors in our model, which could be explained as being  
185 variables that are often correlated with post-operative complications and thus being more costly.  
186 The factor of hospitalization can be explained as being a good predictor of cost because the overall  
187 costs for a hospital will increase if the patient is not progressing after surgery. The same can be  
188 said about the intensive care unit. For the anastomotic insufficiency cases, it is evident as well  
189 that these complications bare a higher burden on the final costs. Mean decrease in Gini is the  
190 mean of a variable's total decrease in node impurity, weighted by the proportion of samples  
191 reaching that node in each individual decision tree in the random forest. A higher mean decrease  
192 in Gini indicates higher variable importance. In other words, a node impurity is a measure of how  
193 much the model error increases when a particular variable is randomly permuted or shuffled.

194 Figure 2 indicates that the predicted values are not far off the actual observed values based  
195 on our data set. For most of the observations, our model was able to perform decently in  
196 predicting the final costs.

197 Figure 3 displays the Bland-Altman plot. The following information can be derived  
198 visually from the diagram: (1) an estimate of the true value on the x-axis (mean) (2) standard  
199 deviation (3) whether and to what extent systematic measurement errors (bias) lead to the  
200 deviations (variability was eliminated by difference formation on y-axis) (4) whether the  
201 deviation of the methods or the dispersion of the deviation depends on the level of the measured



202 values (5) and whether outliers are present. Based on the plot one can imply that the values are  
203 mostly well distributed and not many outliers occur.

204

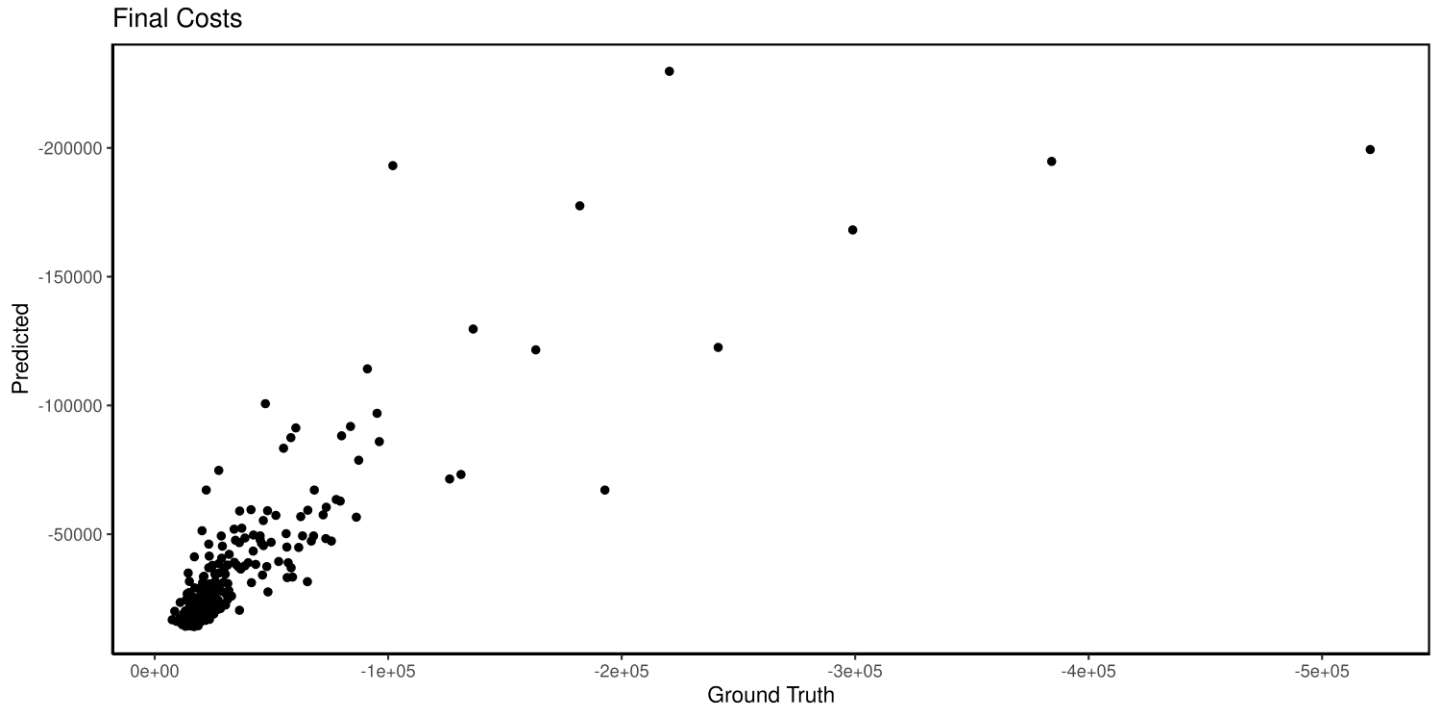

205

206

Figure 2. Predicted vs. Real observations of the model (Ground Truth).

207

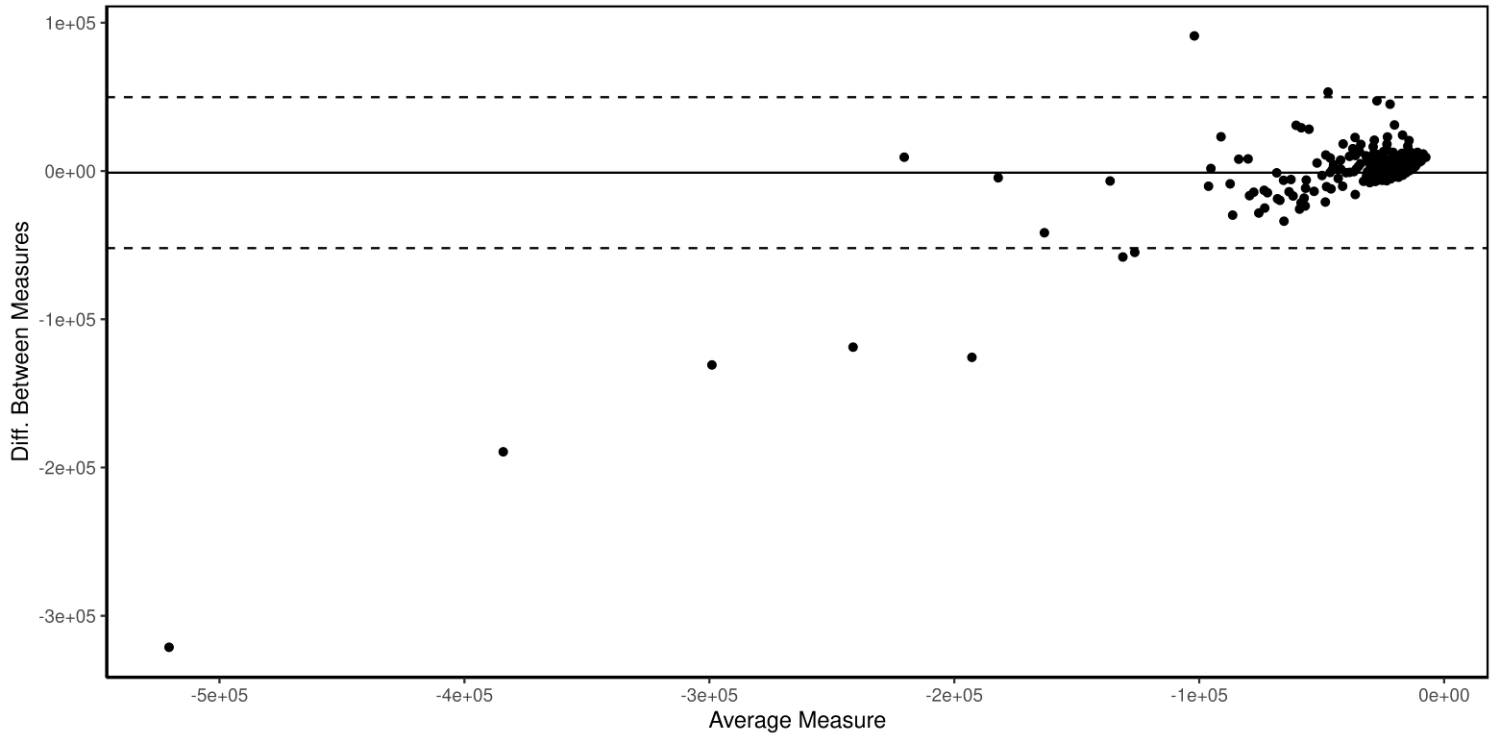

208

209

210 Figure 3. Bland-Altman Plot, measured by the difference of both measured values ( $S1 - S2$ ) plotted on the  
211 Y-axis against the mean value ( $(S1 + S2) / 2$ ) on the X-axis.

212

213

214

#### 215 4. Discussion

216 Cost and finances play an increasingly important role in today's healthcare system. It is  
217 imperative that hospitals control their costs more accurately beforehand and estimate the  
218 expenditure so that they do not get into financial difficulties.

219 Especially in surgery, and specifically colon surgery, this predictive model allows us to better  
220 manage and optimize the process in front of the surgeon and hospital.

221

##### 222 4.1 Interpretation of results

223 As indicated, in this study, three models were developed and tested. The results show that  
224 random forest has the lowest percentage for all the costs examined on MAPE.

225 The lowest MAPE percentage for the random forest model indicates that this model is the  
226 most accurate at predicting costs associated with surgeries compared to the other two models

227 examined. Typically, MAPE is a measure of error. It is used to measure the accuracy of a forecast  
228 (12). In calculating MAPE, the difference between the actual value and the forecast value is  
229 determined and expressed as a percentage. This means that if the difference between the actual  
230 value and the forecast value is small, the percentage is small (13). On the other hand, if the  
231 difference between the actual value and the forecast value is large, MAPE percentage is large.  
232 This implies that a small MAPE percent is an indication of the forecast value being near the actual  
233 value. In other words, the forecast value is more accurate (14). In the case of the three models,  
234 since the random forest model had the lowest MAPE percent value for all the costs compared to  
235 the other models considered, it is the most effective model in predicting the cost.

236 Why is Random Forest the most effective predictive model compared to the decision tree  
237 and generalized boosted regression models? This question can be answered by examining the  
238 model. The random forest model is a machine learning technique that is used to solve  
239 classification and regression problems (15). This model uses ensemble learning, a technique that  
240 combines many classifiers to obtain solutions to complex problems. A random forest algorithm  
241 comprises of multiple decision trees. The forest that is generated by the algorithm is trained  
242 through bootstrap aggregating or bagging (16). Bagging is a meta-algorithm that improves the  
243 machine learning algorithms' accuracy.

244 The random forest algorithm establishes the result from the predictions of decision trees.  
245 It predicts by taking the mean of the prediction output of the various trees (17). This implies that  
246 the predicted outcome by the algorithm becomes more accurate when the number of decision  
247 trees is increased.

248 One of the features of the random forest model that makes it more accurate in predicting  
249 cost outcomes, is it reduces the overfitting problem normally experienced when using the  
250 decision tree model. As indicated, the model uses an ensemble learning method based on bagging  
251 (15, 18). In other words, the model creates many decision trees and then considers the outcomes  
252 of all the trees in its final prediction, enhancing the accuracy of the prediction by the model.

253 However, despite the higher accuracy of the random forest model when compared to the  
254 decision tree and generalized boosted regression models, the model does not have the highest  
255 possible accuracy when considered alone. Normally, when examining the accuracy of a  
256 prediction using MAPE, the result of less than 10% is considered highly accurate. A MAPE score  
257 of less than 20% denotes a good forecast, while that between 20 and 50% is considered a  
258 reasonable forecast (12). Looking at the results, it shows that the random forest model gives  
259 mostly reasonable forecasts rather than accurate forecasts. The model gave an outcome of over  
260 20% when analyzed using the MAPE. This means that while it is the most accurate model when  
261 compared to the other models, when considered alone, it has only considerable accuracy and it  
262 does not accurately predict the cost incurred.

263 A number of similar studies have been carried out on the random forest model in terms of  
264 its accuracy in predicting outcomes. For example, Mei et al. (2014) examined the prediction  
265 accuracy of the random forest model when applying real-time forecasting of the New York  
266 electricity market (18). In reviewing the model's prediction accuracy, its results were compared

267 to that of the auto-regressive-moving-average model and an artificial neural network model. It  
268 was established that the random forest model exhibited a lower MAPE value. The results in the  
269 study by Mei et al. (2014) are similar to those of this study which also show that the random forest  
270 model has a higher level of making fewer mistakes by predicting when compared to other studies  
271 (18). However, the shortcoming of the study by Mei et al. (2014) is it compares the random forest  
272 model to only two other models. This does not provide adequate insight into the model's  
273 prediction accuracy (18). A comparison with additional models would have helped determine  
274 whether the random forest model was the most accurate prediction model or if others were more  
275 accurate.

276 Another similar approach to comparing algorithms was made by Xu et al. (2021), which  
277 developed and tested an accurate prediction model based on the random forest classification  
278 algorithm (19). They evaluated the prediction for inland water quality. To evaluate the  
279 performance of the model, the researchers compared it to other models: multilayer perceptron,  
280 SVR (support vector regression), KNN (K-Nearest Neighbor), ridge regression, gradient boosting  
281 regression, bagging and decision tree. It was established that the random forest-based prediction  
282 model had the highest level of accuracy when compared to all the other prediction models  
283 examined. This implies that random forest provides the most accurate outcomes when used for  
284 prediction. The results in the study by Wang et al. (2020) align with those of this study since it  
285 was also established that the random forest model is the most accurate compared to other models.  
286 The study by Wang et al. (2020) provides better insight into the accuracy of the random forest  
287 model because it compared it to multiple models (19). It is an indication that the random forest  
288 model is one of the most accurate prediction models that can be used to predict costs for surgery.

289 Lastly, the results are in line with those of Toqué et al. (2020), who also established that the  
290 random forest model has a higher accuracy compared to other models (20). In the study, Toqué  
291 et al. (2020) built and tested machine learning models for forecasting the Montreal subway smart  
292 card entry logs using event data to find an optimal model that accurately predicts the number of  
293 incoming passengers at each station of a transportation network (20). The prediction models were  
294 random forest, gradient boosting decision trees, artificial neural networks and kernel-based  
295 models, including a support vector regressor and a gaussian process (20). The results showed that  
296 all the random forest models performed best using RMSE for the evaluation, and did decent using  
297 MAPE and MAE.

298 The results in this study show that all the models have reasonable accuracy as the MAPE  
299 for each of all the costs highlighted is below 50%. This means that all of the models can be used  
300 to predict the costs to some level of accuracy. However, when compared it can be seen that the  
301 random forest model is a more accurate predictor. These results are evident in similar studies  
302 showing that the random forest model is a more accurate prediction model.

#### 303 4.2 Implications

304 One of the implications of the results is that hospitals and other concerned parties can  
305 employ the random forest model to forecast costs not only for colon surgery but also the costs of  
306 other risks and conditions mentioned previously. This work lays the foundation for further work

307 and research in this area. This will allow for better financial calculations for hospitals. Through  
308 such a predictive model, it is possible to better estimate medical costs, which is especially  
309 important when factors such as LOS in the hospital and ICU as well as complications such as  
310 anastomotic insufficiency can have a large financial impact on the high cost. The results show  
311 that the random forest model provides more accurate predictions compared to other models like  
312 generalized boosted regression and decision tree models. It means that for concerned parties to  
313 achieve more accurate results when predicting the costs of conditions or any other outcome, the  
314 random forest model should be employed.

315 Another implication is that there is a need for further research about the model in terms of  
316 enhancing the accuracy of the random forest model. The results show that for the final costs  
317 examined, the accuracy is more than 20%. This is only reasonable accuracy. However, it is way  
318 before the desired value. As indicated, the MAPE value of less than 20% is an indication of a good  
319 forecast, while that of less than 10% shows that the forecast is highly accurate. While achieving a  
320 highly accurate forecast is unlikely, any good prediction model should give a good forecast. With  
321 the random forest model being the most accurate model, this implies that it should be developed  
322 further to improve accuracy as to give more credible results when used to predict outcomes,  
323 meaning further research is needed on the model.

324 Despite the good implications and the wide range of applications, the ethical aspect should  
325 not be ignored. Naik et al. have shown in their work that there are currently no well-defined  
326 guidelines when it comes to treating people with an application such as this. They mention that  
327 transparency must be created when working with such algorithms. Furthermore, weaknesses  
328 such as cyberattacks and privacy invasion should not be ignored if you want to advance this field  
329 and research (21).

#### 330 4.3 Limitations of the study

331 The main limitation of the study is a lack of a representative sample. In this case, the focus  
332 was on patients undergoing colon surgery. However, in the sample dataset, only 347 individuals  
333 met this criterion. This implies that the sample was not selected in the manner that made it  
334 representative of patients undergoing colon surgery. The larger the dataset, the more accurate the  
335 results are. However, the limited number of individuals with common reasons for higher costs  
336 implies that it was not possible to effectively test the developed models in terms of their ability  
337 to predict costs associated with the disease. For such models, there is a need for adequate and  
338 detailed data to ensure they are tested thoroughly. Additionally, an overall increase in the sample  
339 size could result in more precise models by looking at the values in Table 4. Especially the events  
340 per predictor should be bigger.

341 Table 4. Internal validation performance for the 3 developed models

| Classifier                     | MAPE (%) Final Costs |
|--------------------------------|----------------------|
| Random Forest                  | 21.4 (17.2-26.8)     |
| Decision Tree                  | 25.2 (21.4-26.3)     |
| Generalized Boosted Regression | 29.7 (25.2-34.2)     |

342 Note: Scores Reported as Mean (95% Confidence Interval)

343 **5. Conclusion**

344 Post-operative complications such as anastomotic insufficiency, ICU or hospital LOS  
345 increase the cost burden for patients and hospitals. Also, preoperative conditions like CCI  
346 increase cost. However, there is no way of predicting these costs so that a patient or healthcare  
347 system can prepare adequately to handle the condition. This study thereby aimed to develop and  
348 validate a prediction model to accurately predict cost and develop strategies to eliminate or cover  
349 them. Out of the three tested models, the results obtained based on MAPE analysis showed that  
350 the random forest model is the most accurate. Therefore, the results imply this model should be  
351 adopted for prediction. However, the fact that MAPE results were mostly over 20% means that  
352 further research should be undertake on improving its accuracy.

353

354 **Author Contributions:** Conceptualization A.T., B.E., data collection B.E.; analysis V.O., A.T.;  
355 visualization A.T., writing—original draft preparation A.T, V.O.; writing—review and editing  
356 D.F., M.D.H., P.C.C. All authors have read and agreed to the published version of the manuscript.

357 **Funding:** This research received no external funding.

358 **Data Availability Statement:** The datasets used and/or analysed during the current study are  
359 available from the corresponding author on reasonable request.

360 **Conflicts of Interest:** The authors declare no conflicts of interest.

361

## 362 **References**

- 363 1. Xi, Y. and Xu, P., 2021. Global colorectal cancer burden in 2020 and projections to  
364 2040. *Translational Oncology*, 14(10), p.101174.
- 365 2. Soeters, P.B., de Zoete, J.P.J.G.M., Dejong, C.H.C., Williams, N.S. and Baeten, C.G.M.I., 2002.  
366 Colorectal surgery and anastomotic leakage. *Digestive surgery*, 19(2), p.150.
- 367 3. Karliczek, A., Harlaar, N.J., Zeebregts, C.J., Wiggers, T., Baas, P.C. and Van Dam, G.M., 2009.  
368 Surgeons lack predictive accuracy for anastomotic leakage in gastrointestinal  
369 surgery. *International journal of colorectal disease*, 24(5), pp.569-576.
- 370 4. Kourou, K., Exarchos, T.P., Exarchos, K.P., Karamouzis, M.V. and Fotiadis, D.I., 2015.  
371 Machine learning applications in cancer prognosis and prediction. *Computational and*  
372 *structural biotechnology journal*, 13, pp.8-17.
- 373 5. Mosavi, A., Ozturk, P. and Chau, K.W., 2018. Flood prediction using machine learning  
374 models: Literature review. *Water*, 10(11), p.1536.
- 375 6. Musunuri, B., Shetty, S., Shetty, D., Vanahalli, M., Pradhan, A., Naik, N., Paul, R., 2021.  
376 Acute-on-Chronic Liver Failure Mortality Prediction using an Artificial Neural Network.  
377 *Engineered Science*, 15, pp.187-196.
- 378 7. Hameed, B.M.Z.; S. Dhavileswarapu, A.V.L.; Raza, S.Z.; Karimi, H.; Khanuja, H.S.; Shetty,  
379 D.K.; Ibrahim, S.; Shah, M.J.; Naik, N.; Paul, R.; Rai, B.P.; Somani, B.K. Artificial Intelligence  
380 and Its Impact on Urological Diseases and Management: A Comprehensive Review of the  
381 Literature. *J. Clin. Med.* **2021**, *10*, 1864.
- 382 8. Collins, G.S., et al., Transparent reporting of a multivariable prediction model for individual  
383 prognosis or diagnosis (TRIPOD): the TRIPOD statement. 2015. 102(3): p. 148-158.
- 384 9. Bolenz, Gupta, Roehrborn, Lotan, Predictors of costs for robotic assisted laparoscopic radical  
385 prostatectomy, *Urologic Oncology: Seminars and Original Investigations*, Volume 29, Issue  
386 3, 2011, Pages 325-329.
- 387 10. Abidin, S. and Jaffar, M.M. (2014) Forecasting Share Prices of Small Size Companies in Bursa  
388 Malaysia. *Applied Mathematics and Information Sciences*, 8, 107-112
- 389 11. Sushmita, Newman, Marquardt, Ram, Prasad, De Cock, Teredesai, 2015. Population Cost  
390 Prediction on Public Healthcare Datasets. In *Proceedings of the 5<sup>th</sup> International Conference*  
391 *on Digital Health 2015*. Association for Computing Machinery, New York, NY, USA, 87-94.

- 392 12. Coleman, C.D. and Swanson, D.A., 2007. On MAPE-R as a measure of cross-sectional  
393 estimation and forecast accuracy. *Journal of Economic and Social Measurement*, 32(4), pp.219-  
394 233.
- 395 13. Hyndman, R.J. and Koehler, A.B., 2006. Another look at measures of forecast  
396 accuracy. *International journal of forecasting*, 22(4), pp.679-688.
- 397 14. Rayer, S., 2007. Population forecast accuracy: does the choice of summary measure of error  
398 matter?. *Population Research and Policy Review*, 26(2), pp.163-184
- 399 15. Sinha, P., Gaughan, A.E., Stevens, F.R., Nieves, J.J., Sorichetta, A. and Tatem, A.J., 2019.  
400 Assessing the spatial sensitivity of a random forest model: Application in gridded population  
401 modeling. *Computers, Environment and Urban Systems*, 75, pp.132-145
- 402 16. Bharathidasan, S. and Venkataeswaran, C.J., 2014. Improving classification accuracy based  
403 on random forest model with uncorrelated high performing trees. *Int. J. Comput.*  
404 *Appl*, 101(13), pp.26-30.
- 405 17. Wang, L., Liu, Z.P., Zhang, X.S. and Chen, L., 2012. Prediction of hot spots in protein  
406 interfaces using a random forest model with hybrid features. *Protein Engineering, Design &*  
407 *Selection*, 25(3), pp.119-126.
- 408 18. J. Mei, D. He, R. Harley, T. Habetler and G. Qu, "A random forest method for real-time price  
409 forecasting in New York electricity market," *2014 IEEE PES General Meeting | Conference &*  
410 *Exposition*, 2014, pp. 1-5.
- 411 19. Xu, J.; Xu, Z.; Kuang, J.; Lin, C.; Xiao, L.; Huang, X.; Zhang, Y. An Alternative to Laboratory  
412 Testing: Random Forest-Based Water Quality Prediction Framework for Inland and  
413 Nearshore Water Bodies. *Water* 2021, 13, 3262.
- 414 20. Toqué, F., Côme, E., Trépanier, M., Oukellou, F., 2020. Forecasting of the Montreal subway  
415 smart card entry logs with event data. *TRB, CIRRELT-2020-33*.
- 416 21. Naik N, Hameed BMZ, Shetty DK, Swain D, Shah M, Paul R, Aggarwal K, Ibrahim S, Patil  
417 V, Smriti K, Shetty S, Rai BP, Chlosta P and Somani BK (2022) Legal and Ethical  
418 Consideration in Artificial Intelligence in Healthcare: Who Takes Responsibility? *Front. Surg.*  
419 9:862322.
- 420
